# Supplementary material
Source: publisher site journal article supplement (https://www.dovepress.com/article/273108)
Supplement: Supplementary file 1 [file get_supplementary_file.php]

**
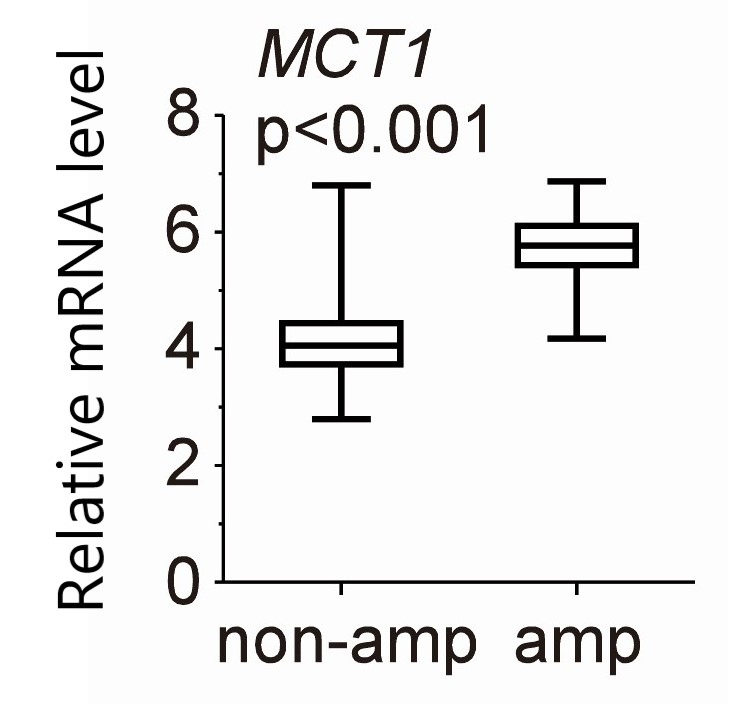
**

**Supplementary Figure 1 The expression of MCT1 in MYCN-amplified neuroblastomas and MYCN-nonamplified neuroblastomas.**

**
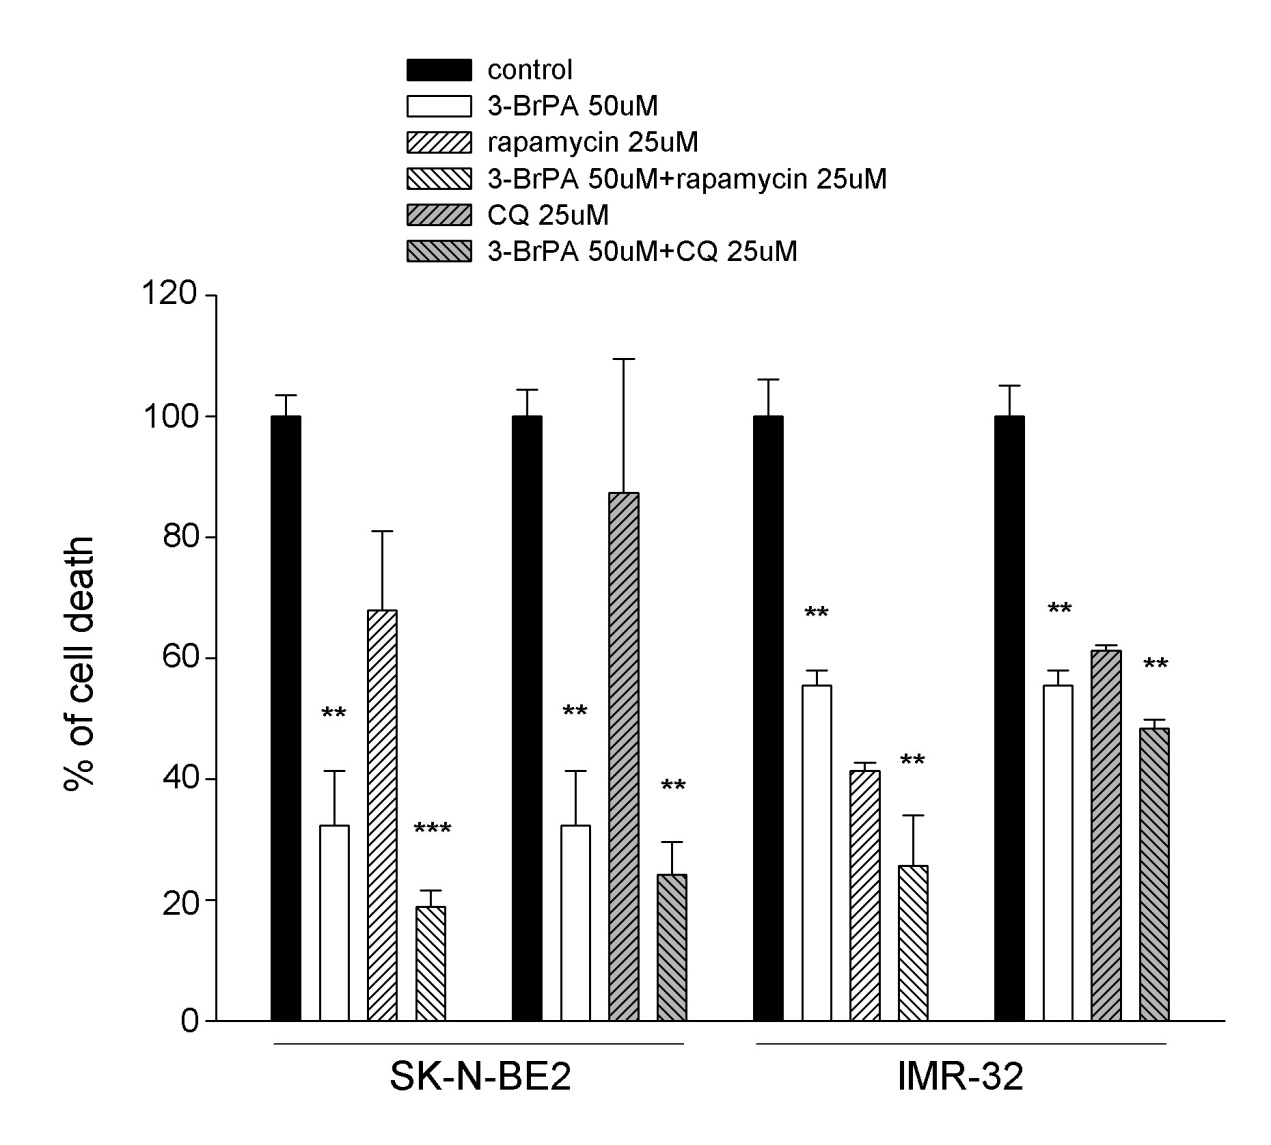
**

**Supplementary Figure 2 Effect of 3-BrPA and rapamycin in MYCN-amplified neuroblastoma cells by CCK-8 analysis.** The cell proliferation effect of 3-BrPA, rapamycin, 3-BrPA + rapamycin, CQ, 3-BrPA + CQ treatment in SK-N-BE2 and IMR-32 by CCK-8 analysis.

**P*<0.05; ***P*<0.01; ****P*<0.001.


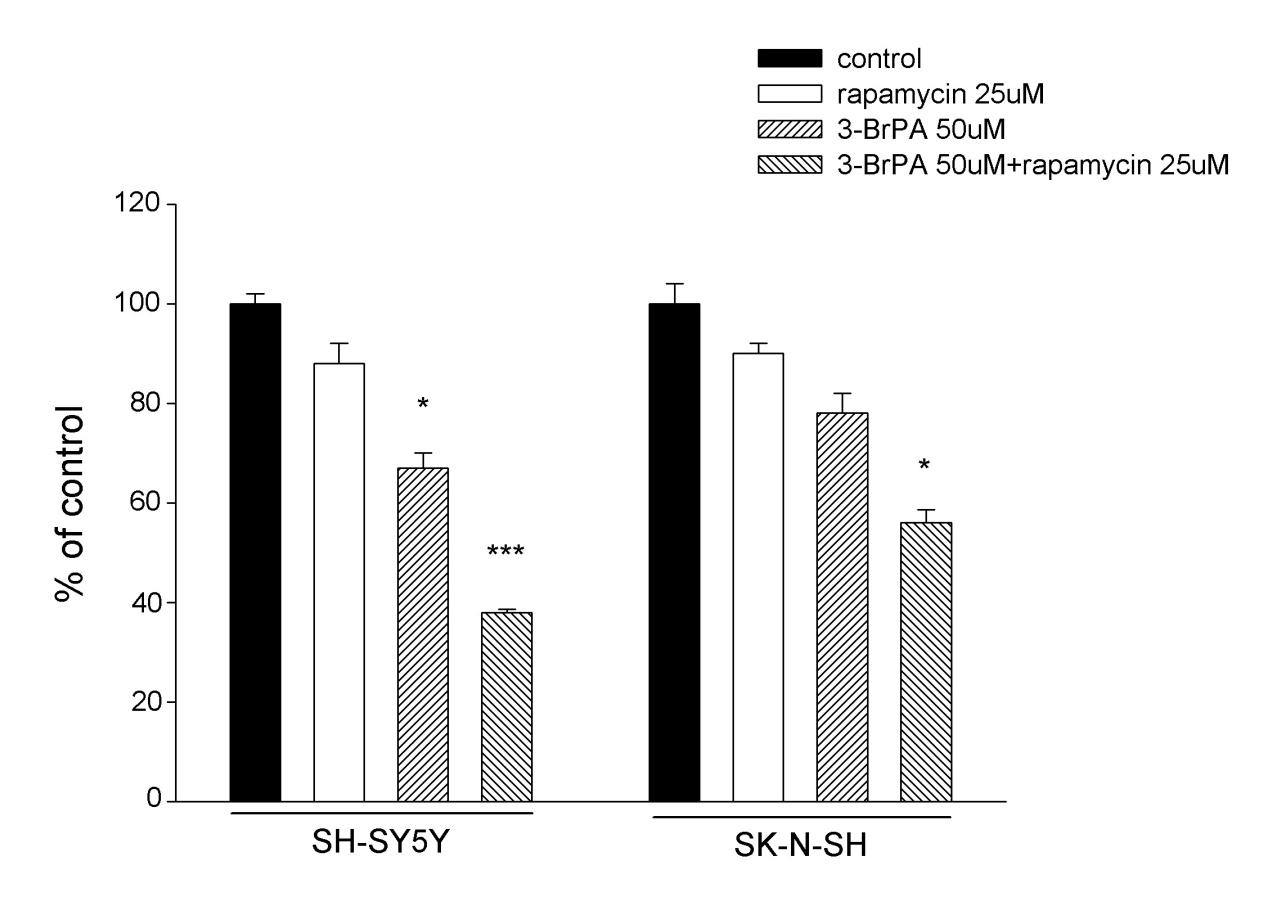


**Supplementary Figure 3 3-BrPA combined with rapamycin induced cell apoptosis in SH-SY5Y and SK-N-SH.** Histogram analysis of differences in the number of neuroblastoma cells under microscope after drug treatment (control, 25μM rapamycin, 50μM 3-BrPA, 50μM 3-BrPA + 25μM rapamycin).

**P*<0.05; ****P*<0.001.
